# Supplementary material for: SIRT2 deacetylates GRASP55 to facilitate post-mitotic Golgi assembly
Source: Oxford University Press journal article supplement (doi:10.1242/jcs.232389), 2019-10-11
Supplement: jcs232389supp.pdf [file jcs232389supp.pdf]

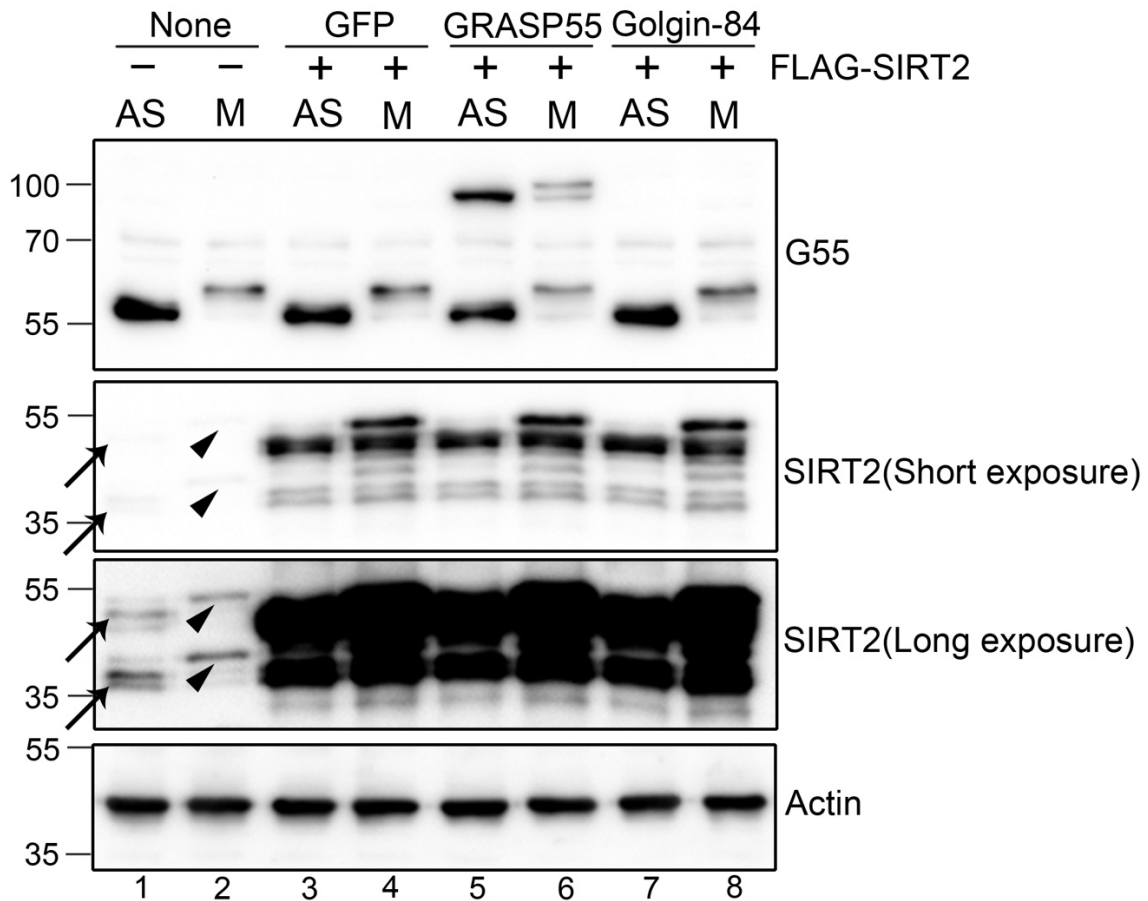

**Figure S1. The endogenous SIRT2 protein level is low.**

Asynchronous (AS) and mitotic HeLa cells or HeLa cells co-overexpressing GFP-tagged GRASP55 or Golgin-84 and FLAG-SIRT2 were lysed, blotted for GRASP55 (G55 in the figure) and SIRT2. Note that the endogenous SIRT2 level (lane 1 and 2) is very low compared to the overexpressed FLAG-SIRT2 (lane 3-8). Arrows indicate asynchronous SIRT2 bands, while arrowheads indicate mitotic SIRT2 bands.

**A.** si Control

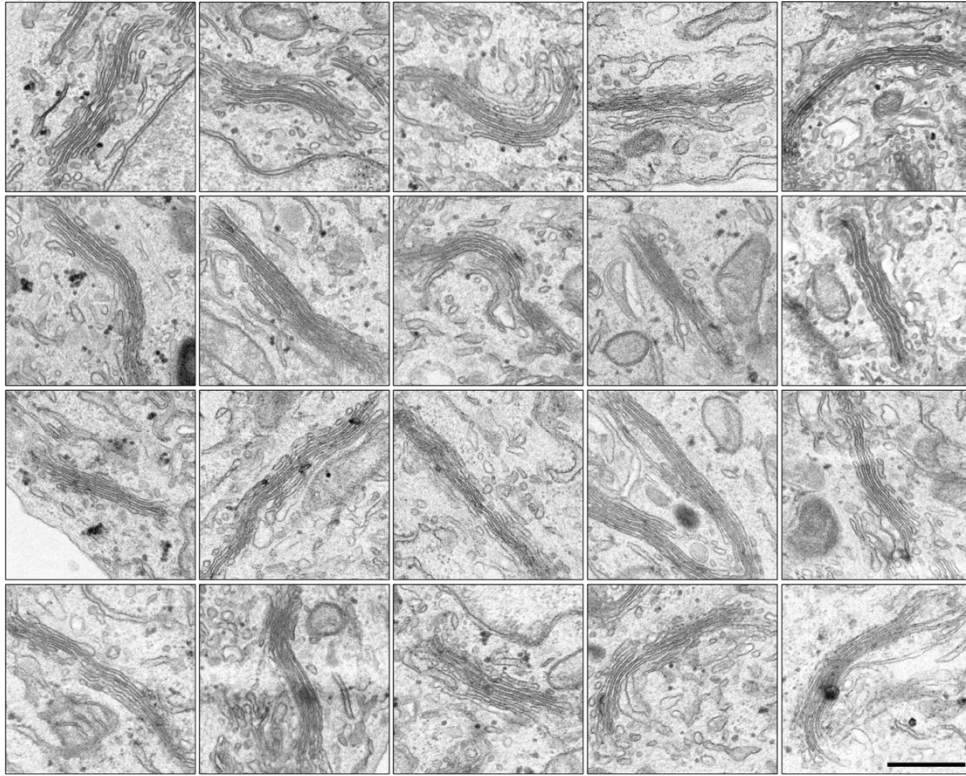

**B.** si SIRT2

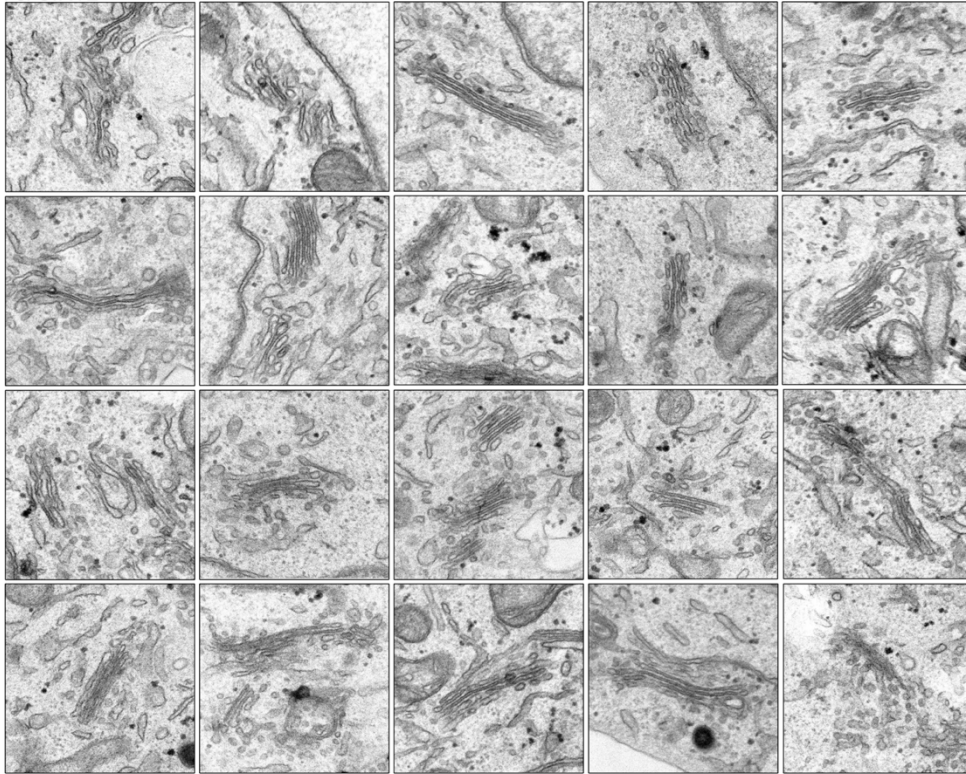

**Figure S2. SIRT2 is required for proper Golgi structure maintenance.**

HeLa cells were transfected with control (**A**) or SIRT2 (**B**) siRNA and analyzed by EM. Shown are galleries of EM images. The reduced average number or length of Golgi cisternae were frequently observed after SIRT2 depletion as displayed in **B**. Scale bar: 500 nm.

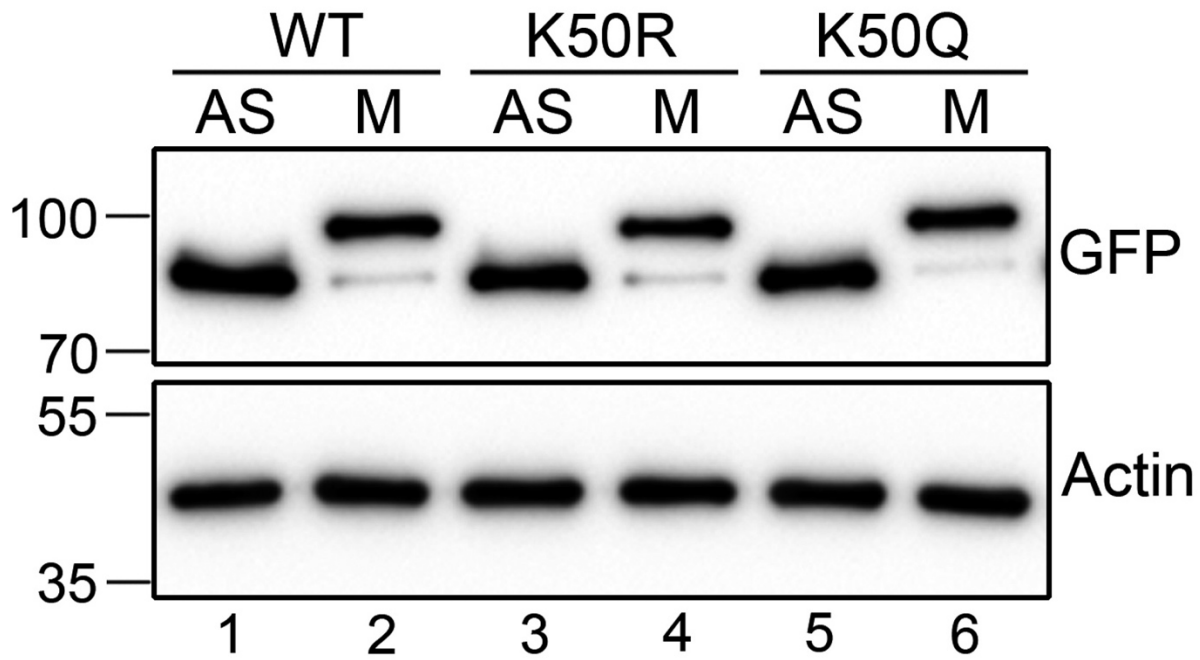

**Figure S3. GRASP55 acetylation status does not affect its phosphorylation in mitosis.**

HeLa cells were transfected with GFP-tagged GRASP55 WT, K50R or K50Q. Non-synchronized (AS) or mitotic (M) cells synchronized with nocodazole were lysed and blotted for GFP. Note that the GRASP55 phosphorylation status indicated by the band-shift is not affected by the acetylation mutations.

**Table S1.** Mass spectrometry analysis of GRASP55 post-translational modifications (acetylation, phosphorylation and ubiquitination) in asynchronous and mitotic HEK293T cells expressing GRASP55-GFP.

[Click here to Download Table S1](#)

**Table S2.** PRM (parallel reaction monitoring) mass spectrometry analysis of GRASP55-GFP K50 acetylation in mitotic HEK293T cells after silencing or overexpressing SIRT2.

[Click here to Download Table S2](#)

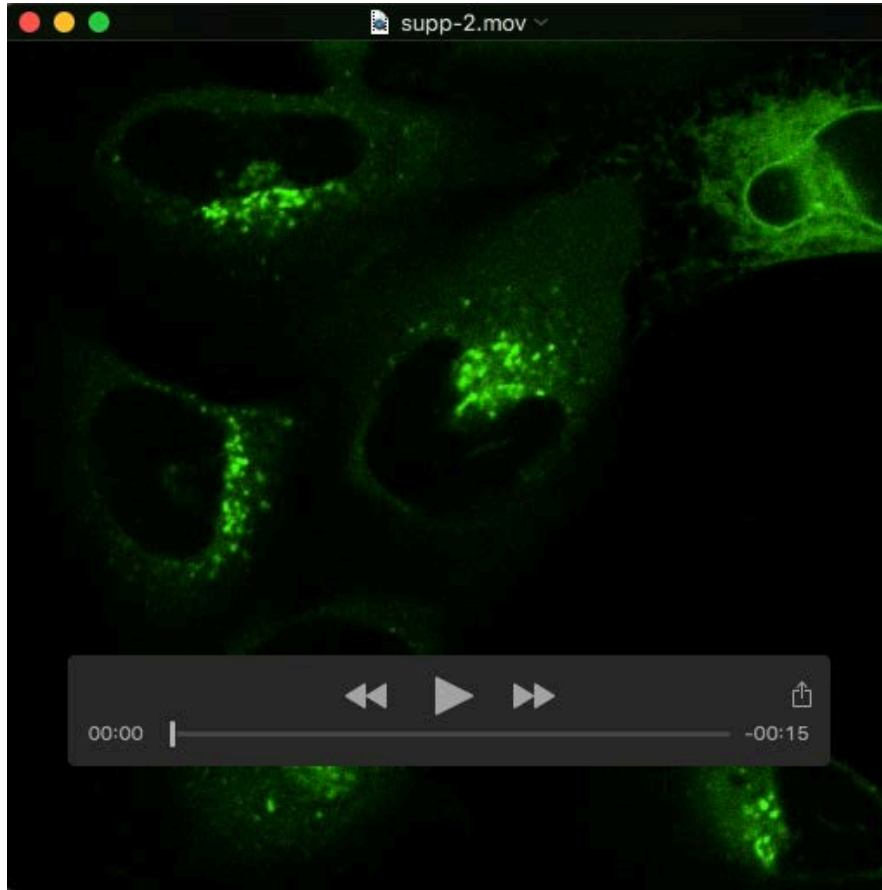

**Movie 1.** Live-cell imaging of GRASP55-GFP U2OS cells 72 h after transfection with si Control.

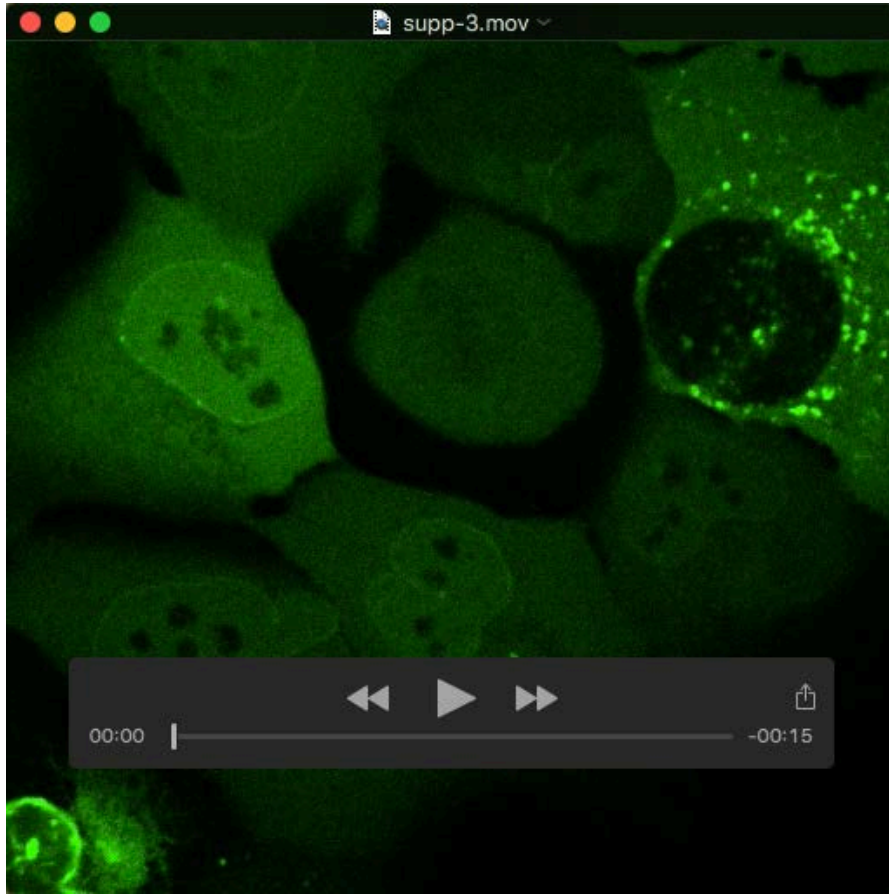

**Movie 2.** Live-cell imaging of GRASP55-GFP U2OS cells 72 h after transfection with si SIRT2.
